# Supplementary material for: Genetic and phylogenetic analysis of Chinese sacbrood virus isolates from Apis mellifera
Source: PubMed Central journal article supplement (PMC6858986; doi:10.7717/peerj.8003), 2019-11-14
Supplement: peerj-07-8003-s002.pdf [file peerj-07-8003-s002.pdf]

+ Consensus #1

Consensus #1

Majority

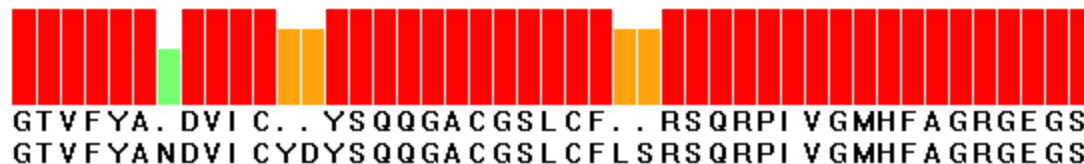

|                                | 2260       | 2270         | 2280           | 2290          |      |
|--------------------------------|------------|--------------|----------------|---------------|------|
| AmCSBV-SDLY.pro                | GTVFYANDVI | CYDYSQQGACGS | LCSLFLSRSQRPI  | VGMHFAGRGE GS | 2276 |
| AcSBV-Kor-HQ322114.1.pro       | GTVFYANDVI | CYDYSQQGACGS | LCSLFLSRSQRPI  | VGMHFAGRGE GS | 2276 |
| AcSBV-Kor4-KP296803.1.pro      | GTVFYANDVI | CYDYSQQGACGS | LCSLFLSRSQRPI  | VGMHFAGRGE GS | 2276 |
| AcSBV-Viet1-KM884990.1.pro     | GTVFYANDVI | CYDYSQQGACGS | LCSLFLSRSQRPI  | VGMHFAGRGE GS | 2276 |
| AcSBV-Viet2- KM884991.1.pro    | GTVFYANDVI | CYDYSQQGACGS | LCSLFLSRSQRPI  | VGMHFAGRGE GS | 2276 |
| AcSBV-Viet3-KM884992.1.pro     | GTVFYANDVI | CYAYSQQGACGS | LCSLFLSRSQRPI  | VGMHFAGRGE GS | 2276 |
| AcSBV-Viet5-KM884994.1.pro     | GTVFYANDVI | CYDYSQQGACGS | LCSLFLSRSQRPI  | VGMHFAGRGE GS | 2276 |
| AcSBV-VietHYnor-KJ959614.1.pro | GTVFYASDVI | CYDYSQQGACGS | LCSLFLPRSQRPI  | VGMHFAGRGE GS | 2276 |
| AmSBV-Viet4-KM884993.1.pro     | GTVFYANDVI | CHDYSQQGACGS | LCSLFLSRSQRPI  | VGMHFAGRGE GS | 2276 |
| AmSBV-Kor19-JQ390592.1.pro     | GTVFYANDVI | CYDYSQQGACGS | LCSLFLSRSQRPI  | VGMHFAGRGE GS | 2276 |
| CSBV-JL2014-KU574661.1.pro     | GTVFYANDVI | CYDYSQQGACGS | LCSLFLSRSQRPI  | VGMHFAGRGE GS | 2276 |
| AcSBV-VietNA-KX668140.1.pro    | GTVFYASDVI | CYDYSQQGACGS | LCSLFLPRSQRPI  | VGMHFAGRGE GS | 2276 |
| CSBV-FZ-KM495267.1.pro         | GTVFYANDVI | CYDYSQQGACGS | LCSLFLSRSQRPI  | VGMHFAGRGE GS | 2281 |
| CSBV-LN2009-HM237361.1.pro     | GTVFYANDVI | CYDYSQQGACGS | LCSLFLSRSQRPI  | VGMHFAGRGE GS | 2281 |
| CSBV-GD-AF469603.1.pro         | GTVFYANDVI | CYDYSQQGACGS | LCSLFLSRSQRPI  | VGMHFAGRGE GS | 2294 |
| CSBV-BJ2012-KF960044.1.pro     | GTVFYASDVI | CYDYSQQGACGS | LCSLFLSRSQRPI  | VGMHFAGRGE GS | 2294 |
| CSBV-SXnor1-KJ000692.1.pro     | GTVFYASDVI | CYDYSQQGACGS | LCSLFLSRSQRPI  | VGMHFAGRGE GS | 2294 |
| CSBV-SXYL-KU574662.1.pro       | GTVFYANDVI | CYDYSQQGACGS | LCSLFLSRSQRPI  | VGMHFAGRGE GS | 2293 |
| AmSBV-Viet6-KM884995.1.pro     | GTVFYASDVI | CYDYSQQGACGS | LCSLFLSRSQRPI  | VGMHFAGRGE GS | 2293 |
| AcSBV-Viet Nam-KJ959613.1.pro  | GTVFYASDVI | CYDYSQQGACGS | LCSLFLSRSQRPI  | VGMHFAGRGE GS | 2293 |
| AcSBV-VietBP-KX668139.1.pro    | GTVFYASDVI | CYDYSQQGACGS | LCSLFLMSRSQRPI | VGMHFAGRGE GS | 2293 |
| AmSBV-Kor2-KP296801.1.pro      | GTVFYANDVI | CYDYSQQGACGS | LCSLFLSRSQRPI  | VGMHFAGRGE GS | 2293 |
| AmSBV-UK-AF092924.1.pro        | GTVFYANDVI | CYDYSQQGACGS | LCSLFLSRSQRPI  | VGMHFAGRGE GS | 2292 |
