# Supplementary material for: Genetic and phylogenetic analysis of Chinese sacbrood virus isolates from Apis mellifera
Source: PeerJ journal article supplement (doi:10.7717/peerj.8003), 2019-11-14
Supplement: Supplementary1.pdf [file Supplementary1.pdf]

+ Consensus #1

Consensus #1

Majority

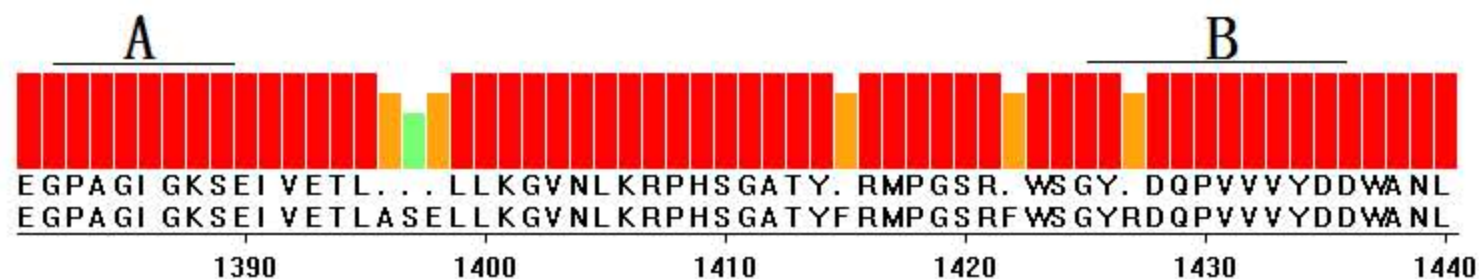

| Accession                      | Sequence                                                         | Position |
|--------------------------------|------------------------------------------------------------------|----------|
| AmCSBV-SDLY.pro                | EGPAGI GKSEI VETLASELLKGVNLKRPHSGATYFRMPGSRFWSGYRDQPVVVYDDWA NL  | 1422     |
| AcSBV-Kor-HQ322114.1.pro       | EGPAGI GKSEI VETLASELLKGVNLKRPHSGATYFRMPGSRFWSGYRDQPVVVYDDWA NL  | 1422     |
| AcSBV-Kor4-KP296803.1.pro      | EGPAGI GKSEI VETLASELLKGVNLKRPHSGATYFRMPGSRFWSGYRDQPVVVYDDWA NL  | 1422     |
| AcSBV-Viet1-KM884990.1.pro     | EGPAGI GKSEI VETLASELLKGVNLKRPHSGATYFRMPGSRFWSGYRDQPVVVYDDWA NL  | 1422     |
| AcSBV-Viet2- KM884991.1.pro    | EGPAGI GKSEI VETLASELLKGVNLKRPHSGATYFRMPGSRFWSGYRDQPVVVYDDWA NL  | 1422     |
| AcSBV-Viet3-KM884992.1.pro     | EGPAGI GKSEI VETLASELLKGVNLKRPHSGATYFRMPGSRFWSGYGDQPVVVYDDWA NL  | 1422     |
| AcSBV-Viet5-KM884994.1.pro     | EGPAGI GKSEI VETLASELLKGVNLKRPHSGATYFRMPGSRFWSGYRDQPVVVYDDWA NL  | 1422     |
| AcSBV-VietHYnor-KJ959614.1.pro | EGPAGI GKSEI VETLASELLKGVNLKRPHSGATYFRMPGSRFWSGYRDQPVVVYDDWA NL  | 1422     |
| AmSBV-Viet4-KM884993.1.pro     | EGPAGI GKSEI VETLASELLKGVNLKRPHSGATYFRMPGSRFWSGYRDQPVVVYDDWA NL  | 1422     |
| AmSBV-Kor19-JQ390592.1.pro     | EGPAGI GKSEI VETLASELLKGVNLKRPHSGATYFRMPGSRFWSGYRDQPVVVYDDWA NL  | 1422     |
| CSBV-JL2014-KU574661.1.pro     | EGPAGI GKSEI VETLASELLKGVNLKRPHSGATYFRMPGSRFWSGYRDQPVVVYDDWA NL  | 1422     |
| AcSBV-VietNA-KX668140.1.pro    | EGPAGI GKSEI VETLATELLKGVNLKRPHSGATYFRMPGSRFWSGYRDQPVVVYDDWA NL  | 1422     |
| CSBV-FZ-KM495267.1.pro         | EGPAGI GKSEI VETLASELLKGVNLKRPHSGATYFRMPGSRFWSGYRDQPVVVYDDWA NL  | 1426     |
| CSBV-LN2009-HM237361.1.pro     | EGPAGI GKSEI VETLATELLKGVNLKRPHSGATYFRMPGSRFWSGYRDQPVVVYDDWA NL  | 1426     |
| CSBV-GD-AF469603.1.pro         | EGPAGI GKSEI VETLASELLKGVNLKRPHSGATYFRMPGSRFWSGYRDQPVVVYDDWA NL  | 1439     |
| CSBV-BJ2012-KF960044.1.pro     | EGPAGI GKSEI VETLATA LLKGVNLKRPHSGATYFRMPGSRFWSGYRDQPVVVYDDWA NL | 1439     |
| CSBV-SXnor1-KJ000692.1.pro     | EGPAGI GKSEI VETLATA LLKGVNLKRPHSGATYFRMPGSRFWSGYRDQPVVVYDDWA NL | 1439     |
| CSBV-SXYL-KU574662.1.pro       | EGPAGI GKSEI VETLTTALLKGVNLKRPHSGATYFRMPGSRFWSGYRDQPVVVYDDWA NL  | 1439     |
| AmSBV-Viet6-KM884995.1.pro     | EGPAGI GKSEI VETLATELLKGVNLKRPHSGATYFRMPGSRFWSGYRDQPVVVYDDWA NL  | 1439     |
| AcSBV-Viet Nam-KJ959613.1.pro  | EGPAGI GKSEI VETLATELLKGVNLKRPHSGATYFRMPGSRFWSGYRDQPVVVYDDWA NL  | 1439     |
| AcSBV-VietBP-KX668139.1.pro    | EGPAGI GKSEI VETLATELLKGVNLKRPHSGATYLRMPGSR LWSGYRDQPVVVYDDWA NL | 1439     |
| AmSBV-Kor2-KP296801.1.pro      | EGPAGI GKSEI VETLASELLKGVNLKRPHSGATYFRMPGSRFWSGYRDQPVVVYDDWA NL  | 1439     |
| AmSBV-UK-AF092924.1.pro        | EGPAGI GKSEI VETLATELLKGVNLKRPHSGATYFRMPGSRFWSGYRDQPVVVYDDWA NL  | 1438     |

C

+ Consensus #1

Consensus #1

Majority

EKKI RGNPLI VI LLCNHAF PDSAVTNMSLEPSAI Y  
EKKI RGNPLI VI LLCNHAF PDSAVTNMSLEPSAI Y

1480

1490

1500

|                                |                                          |      |
|--------------------------------|------------------------------------------|------|
| AmCSBV-SDLY.pro                | EKKI RGNPLI VI LLCNHAF PDSAVTNMSLEPSAI Y | 1487 |
| AcSBV-Kor-HQ322114.1.pro       | EKKI RGNPLI VI LLCNHAF PDSAVTNMSLEPSAI Y | 1487 |
| AcSBV-Kor4-KP296803.1.pro      | EKKI RGNPLI VI LLCNHAF PDSAVTNMSLEPSAI Y | 1487 |
| AcSBV-Viet1-KM884990.1.pro     | EKKI RGNPLI VI LLCNHAF PDSAVTNMSLEPSAI Y | 1487 |
| AcSBV-Viet2- KM884991.1.pro    | EKKI RGNPLI VI LLCNHAF PDSAVTNMSLEPSAI Y | 1487 |
| AcSBV-Viet3-KM884992.1.pro     | EKKI RGNPLI VI LLCNHAF PDSAVTNMSLEPSAI Y | 1487 |
| AcSBV-Viet5-KM884994.1.pro     | EKKI RGNPLI VI LLCNHAF PDSAVTNMSLEPSAI Y | 1487 |
| AcSBV-VietHYnor-KJ959614.1.pro | EKKI RGNPLI VI LLCNHAF PDSAVTNMSLEPSAI Y | 1487 |
| AmSBV-Viet4-KM884993.1.pro     | EKKI RGNPLI VI LLCNHAF PDSAVTNMSLEPSAI Y | 1487 |
| AmSBV-Kor19-JQ390592.1.pro     | EKKI RGNPLI VI LLCNHAF PDSAVTNMSLEPSAI Y | 1487 |
| CSBV-JL2014-KU574661.1.pro     | EKKI RGNPLI VI LLCNHAF PDSAVTNMSLEPSAI Y | 1487 |
| AcSBV-VietNA-KX668140.1.pro    | EKKI RGNPLI VI LLCNHAF PDSAVTNMSLEPSAI Y | 1487 |
| CSBV-FZ-KM495267.1.pro         | EKKI RGNPLI VI LLCNHAF PDSAVTNMSLEPSAI Y | 1491 |
| CSBV-LN2009-HM237361.1.pro     | EKKI RGNPLI VI LLCNHAF PDSAVTNMSLEPSAI Y | 1491 |
| CSBV-GD-AF469603.1.pro         | EKKI RGNPLI VI LLCNHAF PDSAVTNMSLEPSAI Y | 1504 |
| CSBV-BJ2012-KF960044.1.pro     | EKKI RGNPLI VI LLCNHAF PDSAVTNMSLEPSAI Y | 1504 |
| CSBV-SXnor1-KJ000692.1.pro     | EKKI RGNPLI VI LLCNHAF PDSAVTNMSLEPSAI Y | 1504 |
| CSBV-SXYL-KU574662.1.pro       | EKKI RGNPLI VI LLCNHAF PDSAVTNMSLEPSAI Y | 1504 |
| AmSBV-Viet6-KM884995.1.pro     | EKKI RGNPLI VI LLCNHAF PDSAVTNMSLEPSAI Y | 1504 |
| AcSBV-Viet Nam-KJ959613.1.pro  | EKKI RGNPLI VI LLCNHAF PDSAVTNMSLEPSAI Y | 1504 |
| AcSBV-VietBP-KX668139.1.pro    | EKKI RGNPLI VI LLCNHAF PDSAVTNMSLEPSAI Y | 1504 |
| AmSBV-Kor2-KP296801.1.pro      | EKKI RGNPLI VI LLCNHAF PDSAVTNMSLEPSAI Y | 1504 |
| AmSBV-UK-AF092924.1.pro        | EKKI RGNPLI VI LLCNHAF PDSAVTNMSLEPSAI Y | 1503 |
