# Supplementary material for: Genetic and phylogenetic analysis of Chinese sacbrood virus isolates from Apis mellifera
Source: PeerJ journal article supplement (doi:10.7717/peerj.8003), 2019-11-14
Supplement: Supplementary_3.pdf [file Supplementary_3.pdf]

|                                | 2470 | 2480         | 2490    | 2500        | 2510 | 2520    | 2530    |          |      |           |       |      |
|--------------------------------|------|--------------|---------|-------------|------|---------|---------|----------|------|-----------|-------|------|
| AmCSBV-SDLY.pro                | 2444 | TSAGFPYVATEK | KRKEDYI | VFERNENEQPI | GATI | DPSVLEE | MKRKSEL | RRQGVQPI | TPFI | DTLKDERKL | PEKVR | 2517 |
| AcSBV-Kor-HQ322114.1.pro       |      | TSAGFPYVATEK | KRKEDYI | VFERNENEQPI | GATI | DPGVLEE | MKRKSEL | RRQGVQPI | TPFI | DTLKDERKL | PEKVR | 2517 |
| AcSBV-Kor4-KP296803.1.pro      |      | TSAGFPYVATEK | KRKEDYI | VFERNENEQPI | GATI | DPSVLEE | MKRKSDL | RRQGVQPI | TPFI | DTLKDERKL | PEKVR | 2517 |
| AcSBV-Viet1-KM884990.1.pro     |      | TSAGFPYVATEK | KRKEDYI | VFERNENEQPI | GATI | DPSVLEE | MKRKSEL | RRQGVQPI | TPFI | DTLKDERKL | PEKVR | 2517 |
| AcSBV-Viet2-KM884991.1.pro     |      | TSAGFPYVATEK | KRKEDYI | VFERNENEQPI | GATI | DPSVLEE | MKRKSEL | RRQGVQPI | TPFI | DTLKDERKL | PEKVR | 2517 |
| AcSBV-Viet3-KM884992.1.pro     |      | TSAGFPYVATEK | KRKEDYI | VFERNENEQPI | GATI | DPSVLEE | MKRKSEL | RRQGVQPI | TPFI | DTLKDERKL | PEKVR | 2517 |
| AcSBV-Viet5-KM884994.1.pro     |      | TSAGFPYVATEK | KRKEDYI | VFERNENEQPI | GATI | DPSVLEE | MKRKSDL | RRQGVQPI | TPFI | DTLKDERKL | PEKVR | 2517 |
| AcSBV-VietHYnor-KJ959614.1.pro |      | TSAGFPYVATEK | KRKEDYI | VFERNENEQPI | GATI | DPSVLEE | MKRKSDL | RRQGVQPI | TPFI | DTLKDERKL | PEKVR | 2517 |
| AmSBV-Viet4-KM884993.1.pro     |      | TSAGFPYVATEK | KRKEDYI | VFERNENEQPI | GATI | DPSVLEE | MKRKSEL | RRQGVQPI | TPFI | DTLKDERKL | PEKVR | 2517 |
| AmSBV-Kor19-JQ390592.1.pro     |      | TSAGFPYVATEK | KRKEDYI | VFERNENEQPI | GATI | DPGVLEE | MKRKSEL | RRQGVQPI | TPFI | DTLKDERKL | PEKVR | 2517 |
| CSBV-JL2014-KU574661.1.pro     |      | TSAGFPYVATDK | KRKEDYI | VFERNENEQPI | GATI | DPSVLEE | MKRKSEL | RRQGVQPI | TPFI | DTLKDERKL | PEKVR | 2517 |
| AcSBV-VietNA-KX668140.1.pro    |      | TSAGFPYVATEK | KRKEDYI | VFERNENEQPI | GATI | DPSVLEE | MKRKSDL | RRQGVQPI | TPFI | DTLKDERKL | PEKVR | 2517 |
| CSBV-FZ-KM495267.1.pro         |      | TSAGFPYVATEK | KRKEDYI | VFERNENEQPI | GATI | DPSVLEE | MKRKSEL | RRQGVQPI | TPFI | DTFKDERKL | PEKVR | 2522 |
| CSBV-LN2009-HM237361.1.pro     |      | TSAGFPYVATDK | KRKEDYI | VFERNENEQPI | GATI | DPSVLEE | MKRKSEL | RRQGVQPI | TPFI | DTLKDERKL | PEKVR | 2522 |
| CSBV-GD-AF469603.1.pro         |      | TSAGFPYVATEK | KRKEDYI | VFERNENEQPI | GATI | DPGVLEE | MKRKSEL | RRQGVQPI | TPFI | DTLKDERKL | PEKVR | 2535 |
| CSBV-BJ2012-KF960044.1.pro     |      | TSAGFPYVATEK | KRKEDYI | VFERNENEQPI | GATI | DPSVLEE | MKRKSEL | RRQGVQPI | TPFI | DTLKDERKL | PEKVR | 2535 |
| CSBV-SXnor1-KJ000692.1.pro     |      | TSAGFPYVATEK | KRKEDYI | VFERNENEQPI | GAI  | DPSVLEE | MKRKSEL | RRQGVQPI | TPFI | DTLKDERKL | PEKVR | 2535 |
| CSBV-SXYL-KU574662.1.pro       |      | TSAGFPYVATEK | KRKEDYI | VFERNENEQPI | GAAI | DPGVLEE | MKRKSEL | RRQGVQPI | TPFI | DTLKDERKL | PEKVR | 2534 |
| AmSBV-Viet6-KM884995.1.pro     |      | TSAGFPYVATEK | KRKEDYI | VFERNENEQPI | GGTI | DPGVLEE | MKRKSEL | RRQGVQPI | TPFI | DTLKDERKL | PEKVR | 2534 |
| AcSBV-Viet Nam-KJ959613.1.pro  |      | TSAGFPYVATEK | KRKEDYI | VFERNENEQPI | GATI | DPGVLEE | MKRKSEL | RRQGVQPI | TPFI | DTLKDERKL | PEKVR | 2534 |
| AcSBV-VietBP-KX668139.1.pro    |      | TSAGFPYVATEK | KRKEDYI | VFERNENEQPI | GATI | DPGVLEE | MKRKSEL | RRQGVQPI | TPFI | DTLKDERKL | PEKVR | 2534 |
| AmSBV-Kor2-KP296801.1.pro      |      | TSAGFPYVATEK | KRKEDYI | VFERNENEQPI | GATI | DPSVLEE | MKRKSDL | RRQGVQPI | TPFI | DTLKDERKL | PEKVR | 2534 |
| AmSBV-UK-AF092924.1.pro        |      | TSAGFPYVATEK | KRKEDYI | VFERNENEQPI | GATI | DPGVLEE | MKRKSEL | RRQGVQPI | TPFI | DTLKDERKL | PEKVR | 2533 |

|                                | II            |      |                             |           | III          |      |      |
|--------------------------------|---------------|------|-----------------------------|-----------|--------------|------|------|
|                                | 2540          | 2550 | 2560                        | 2570      | 2580         | 2590 | 2600 |
| AmCSBV-SDLY.pro                | KYGGTRVFCNPPI | DYI  | VSMRQYYMHFVAAFMEQRFKLMHAVGI | NVQSTEWTL | LASKLLAKGNNI | C    | 2582 |
| AcSBV-Kor-HQ322114.1.pro       | KYGGTRVFCNPPI | DYI  | VSMRQYYMHFVAAFMEQRFKLMHAVGI | NVQSTEWTL | LASKLLAKGNNI | C    | 2582 |
| AcSBV-Kor4-KP296803.1.pro      | KYGGTRVFCNPPI | DYI  | VSMRQYYMHFVAAFMEQRFKLMHAVGI | NVQSTEWTL | LASKLLAKGNNI | C    | 2582 |
| AcSBV-Viet1-KM884990.1.pro     | KYGGTRVFCNPPI | DYI  | VSMRQYYMHFVAAFMEQRFKLMHAVGI | NVQSTEWTL | LASKLLAKGNNI | C    | 2582 |
| AcSBV-Viet2-KM884991.1.pro     | KYGGTRVFCNPPI | DYI  | VSMRQYYMHFVAAFMEQRFKLMHAVGI | NVQSTEWTL | LASKLLAKGNNI | C    | 2582 |
| AcSBV-Viet3-KM884992.1.pro     | KYGGTRVFCNPPI | DYI  | VSMRQYYMHFVAAFMEQRFKLMHAVGI | NVQSTEWTL | LASKLLAKGNNI | C    | 2582 |
| AcSBV-Viet5-KM884994.1.pro     | KYGGTRVFCNPPI | DYI  | VSMRQYYMHFVAAFMEQRFKLMHAVGI | NVQSTEWTL | LASKLLAKGNNI | C    | 2582 |
| AcSBV-VietHYnor-KJ959614.1.pro | KYGGTRVFCNPPI | DYI  | VSMRQYYMHFVAAFMEQRFKLMHAVGI | NVQSTEWTL | LASKLLAKGNNI | C    | 2582 |
| AmSBV-Viet4-KM884993.1.pro     | KYGGTRVFCNPPI | DYI  | VSMRQYYMHFVAAFMEQRFKLMHAVGI | NVQSTEWTL | LASKLLAKGNNI | C    | 2582 |
| AmSBV-Kor19-JQ390592.1.pro     | KYGGTRVFCNPPI | DYT  | VSMRQYYMHFVAAFMEQRFKLMHAVGI | NVQSTEWTL | LASKLLAKGNNI | C    | 2582 |
| CSBV-JL2014-KU574661.1.pro     | KYGGTRVFCNPPI | DYI  | VSMRQYYMHFVAAFMEQRFKLMHAVGI | NVQSTEWTL | LASKLLAKGNNI | C    | 2582 |
| AcSBV-VietNA-KX668140.1.pro    | KYGGTRVFCNPPI | DYI  | VSMRQYYMHFVAAFMEQRFKLMHAVGI | NVQSTEWTL | LASKLLAKGNNI | C    | 2582 |
| CSBV-FZ-KM495267.1.pro         | KYGGTRVFCNPPI | DYI  | VSMRQYYMHFVAAFMEQRFKLMHAVGI | NVQSTEWTL | LASKLLAKGNNI | C    | 2587 |
| CSBV-LN2009-HM237361.1.pro     | KYGGTRVFCNPPI | DYI  | VSMRQYYMHFVAAFMEQRFKLMHAVGI | NVQSTEWTL | LASKLLAKGNNI | C    | 2587 |
| CSBV-GD-AF469603.1.pro         | KYGGTRVFCNPPI | DYI  | VSMRQYYMHFVAAFMEQRFKLMHAVGI | NVQSTEWTL | LASKLLAKGNNI | C    | 2600 |
| CSBV-BJ2012-KF960044.1.pro     | KYGGTRVFCNPPI | DYI  | VSMRQHMHFVAAFMEQRFKLMHAVGI  | NVQSTEWTL | LASKLLAKGNNI | C    | 2600 |
| CSBV-SXnor1-KJ000692.1.pro     | KYGGTRVFCNPPI | DYI  | VSMRQHMHFVAAFMEQRFKLMHAVGI  | NVQSTEWTL | LASKLLAKGNNI | C    | 2600 |
| CSBV-SXYL-KU574662.1.pro       | KYGGTRVFCNPPI | DYI  | VSMRQHMHFVAAFMEYRFKLMHAVGI  | NVQSTEWTL | LASKLLAKGNNI | C    | 2599 |
| AmSBV-Viet6-KM884995.1.pro     | KYGGTRVFCNPSI | DYI  | VSMRQYYMHFVAAFMEQRFKLMHAVGI | NVQSTEWTL | LASKLLAKGNNI | C    | 2599 |
| AcSBV-Viet Nam-KJ959613.1.pro  | KYGGTRVFCNPSI | DYI  | VSMRQYYMHFVAAFMEQRFKLMHAVGI | NVQSTEWTL | LASKLLAKGNNI | C    | 2599 |
| AcSBV-VietBP-KX668139.1.pro    | KYGGTRVFCYPSI | DYI  | VSMRQYYMHFVAAYMELRFKLMHAVGI | NVQSTEWTL | LASKLLAKGNNI | C    | 2599 |
| AmSBV-Kor2-KP296801.1.pro      | KYGGTRVFCNPPI | DYI  | VSMRQYYMHFVAAFMEQRFKLMHAVGI | KVQSTEWTL | LASKLLAKGNNI | C    | 2599 |
| AmSBV-UK-AF092924.1.pro        | KYGGTRVFCNPPI | DYI  | VSMRQYYMHFVAAFMEQRFKLMHAVGI | NVQSTEWTL | LASKLLAKGNNI | C    | 2598 |

## IV

|                                | 2610          | 2620      | 2630         | 2640       | 2650      | 2660      |           |
|--------------------------------|---------------|-----------|--------------|------------|-----------|-----------|-----------|
| AmCSBV-SDLY.pro                | TI DYSNFGPGFN | AKAAMELMV | RWTMEHVEGV   | NEIEAHTLL  | HECLNSVHL | VSNTLYQQK | CGSP 2647 |
| AcSBV-Kor-HQ322114.1.pro       | TI DYSNFGPGFN | AKAAMELMV | RWTMEHVEGV   | NEIEANTLL  | HECLNSVHL | VSNTLYQQK | CGSP 2647 |
| AcSBV-Kor4-KP296803.1.pro      | TI DYSNFGPGFN | AKAAMELMV | RWTMEHVEGV   | NEIEAHTLL  | HECLNSVHL | VSNTLYQQK | CGSP 2647 |
| AcSBV-Viet1-KM884990.1.pro     | TI DYSNFGPGFN | AKAAMELMV | RWTMEHVEGV   | NEIEAHTLL  | HECLNSVHL | VSNTLYQQK | CGSP 2647 |
| AcSBV-Viet2-KM884991.1.pro     | TI DYSNFGPGFN | AKAAMELMV | RWTMEHVEGV   | NEIEAHTLL  | HECLNSVHL | VSNTLYQQK | CGSP 2647 |
| AcSBV-Viet3-KM884992.1.pro     | TI DYSNFGPGFN | AKAAMELMV | RWTMEHVEGV   | NEIEAHTLL  | HECLNSVHL | VSNTLYQQK | CGSP 2647 |
| AcSBV-Viet5-KM884994.1.pro     | TI DYSNFGPGFN | AKAAMELV  | V RWTMEHVEGV | NEIEAHTLL  | HECLNSVHL | VSNTLYQQK | CGSP 2647 |
| AcSBV-VietHYnor-KJ959614.1.pro | TI DYSNFGPGFN | AKAAMELMV | RWTMEHVEGV   | NEIEAHTLL  | HECLNSVHL | VSNTLYQQK | CGSP 2647 |
| AmSBV-Viet4-KM884993.1.pro     | TI DYSNFGPGFN | AKAAMELMV | RWTMEHVEGV   | NEIEAHTLL  | HECLNSVHL | VSNTLYQQK | CGSP 2647 |
| AmSBV-Kor19-JQ390592.1.pro     | TI DYSNFGPGFN | AKAAMELV  | V RWTMEHVEGV | NEIEANTLL  | HECLNSVHL | VSNTLYQQK | CGSP 2647 |
| CSBV-JL2014-KU574661.1.pro     | TI DYSNFGPGFN | AKAAMELMV | RWTMEHVEGV   | NETEAHTLL  | HECLNSVHL | VSNTLYQQK | CGSP 2647 |
| AcSBV-VietNA-KX668140.1.pro    | TI DYSNFGPGFN | AKAAMELMV | RWTMEHVEGV   | NEIEAYTLL  | HECLNSVHL | VSNTLYQQK | CGSP 2647 |
| CSBV-FZ-KM495267.1.pro         | TI DYSNFGPGFN | AKAAMELMV | RWTMEHVEGV   | NEIEAHTLL  | HECLNSVHL | VSNTLYQQK | CGSP 2652 |
| CSBV-LN2009-HM237361.1.pro     | TI DYSNFGPGFN | AKAAMELMV | RWTMEHVEGV   | NETEAHTLL  | HECLNSVHL | VSNTLYQQK | CGSP 2652 |
| CSBV-GD-AF469603.1.pro         | TI DYSNFGPGFN | AKAAMELMV | RWTMEHVEGV   | NEIEAYTLL  | HECLNSVHL | VSNTLYQQK | CGSP 2665 |
| CSBV-BJ2012-KF960044.1.pro     | TI DYSNFGPGFN | AKAAMELMV | RWTMEHVEGV   | NEIEAHTLL  | HECLNSVHL | VSNTLYQQK | CGSP 2665 |
| CSBV-SXnor1-KJ000692.1.pro     | TI DYSNFGPGFN | AKAAMELMV | RWTMEHVEGV   | NEIEAHTLL  | HECLNSVHL | VSNTLYQQK | CGSP 2665 |
| CSBV-SXYL-KU574662.1.pro       | TI DYSNFGPGFN | AKAAMELMV | RWTMEHVEGV   | NEIEAHTLL  | HECLNSVHL | VSNTLYQQK | CGSP 2664 |
| AmSBV-Viet6-KM884995.1.pro     | TI DYSNFGPGFN | AKAAMDLMV | RWTMEHVEGV   | NEL EAYTLL | HECLNSVHL | VSNTLYQQK | CGSP 2664 |
| AcSBV-Viet Nam-KJ959613.1.pro  | TI DYSNFGPGFN | AKAAMDLMV | RWTMEHVEGV   | NEL EAYTLL | HECLNSVHL | VSNTLYQQK | CGSP 2664 |
| AcSBV-VietBP-KX668139.1.pro    | TI DYSNFGPGFN | AKAAMDLMV | RWTMEHVEGV   | NEL VAYTLL | HECLNSVQL | VSNTLYQQK | CGSP 2664 |
| AmSBV-Kor2-KP296801.1.pro      | TI DYSNFGPGFN | AKAAMELMV | RWTMEHVEGV   | NEIEAHTLL  | HECLNSVHL | VSNTLYQQK | CGSP 2664 |
| AmSBV-UK-AF092924.1.pro        | TI DYSNFGPGFN | AKAAMELMV | RWTMEHVEGV   | NEIEAYTLL  | HECLNSVHL | VSNTLYQQK | CGSP 2663 |

|                                | V     |      |        |      | VI            |          |        |          |     |      |      |        |     |      |
|--------------------------------|-------|------|--------|------|---------------|----------|--------|----------|-----|------|------|--------|-----|------|
|                                | 2670  | 2680 | 2690   | 2700 | 2710          | 2720     | 2730   |          |     |      |      |        |     |      |
| AmCSBV-SDLY.pro                | SGAPI | TVVI | NTLVNI | LYI  | FVAWETLVGSKER | GQTWE    | SFKQNV | ELFCYGD  | DLI | MSVT | DI   | YKDT   | FNA | 2712 |
| AcSBV-Kor-HQ322114.1.pro       | SGAPI | TVVI | NTLVNI | LYI  | FVAWETLVGSKER | GQMWEI   | FKQNV  | ELFCYGD  | DLI | MSVT | DKYK | DTFNA  |     | 2712 |
| AcSBV-Kor4-KP296803.1.pro      | SGAPI | TVVI | NTLVNI | LYI  | FVAWETLVGSKER | GQTWE    | SFKLN  | VELFCYGD | DLI | MSVT | DKYK | DI     | FNA | 2712 |
| AcSBV-Viet1-KM884990.1.pro     | SGAPI | TVVI | NTLVNI | LYI  | FVAWETLVGSKER | GQTWE    | SFKQNV | ELFCYGD  | DLI | MSVT | EKEY | KDTFNA |     | 2712 |
| AcSBV-Viet2-KM884991.1.pro     | SGAPI | TVVI | NTLVNI | LYI  | FVAWETLVGSKER | GQTWE    | SFKQNV | ELFCYGD  | DLI | MSVT | EKEY | KDTFNA |     | 2712 |
| AcSBV-Viet3-KM884992.1.pro     | SGAPI | TVVI | NTLVNI | LYI  | FVAWETLVGSKER | GQTWE    | SFKQNV | ELFCYGD  | DLI | MSVT | EKEY | KDTFNA |     | 2712 |
| AcSBV-Viet5-KM884994.1.pro     | SGAPI | TVVI | NTLVNI | LYI  | FVAWETLVGSKER | GQTWE    | SFKLN  | VELFCYGD | DLI | MSVT | DKYK | DI     | FNA | 2712 |
| AcSBV-VietHYnor-KJ959614.1.pro | SGAPI | TVVI | NTLVNI | LYI  | FVAWETLVGSKER | GQTWE    | SFKLN  | VELFCYGD | DLI | MSVT | DKYK | DI     | FNA | 2712 |
| AmSBV-Viet4-KM884993.1.pro     | SGAPI | TVVI | NTLVNI | LYI  | FVAWETLVGSKER | GQTWE    | SFKQNV | ELFCYGD  | DLI | MSVT | EKEY | KDTFNA |     | 2712 |
| AmSBV-Kor19-JQ390592.1.pro     | SGAPI | TVVI | NTLVNI | LYI  | FVAWETLVGSKER | GQMWEI   | FKQNV  | ELFCYGD  | DLI | MSVT | DKYK | DTFNA  |     | 2712 |
| CSBV-JL2014-KU574661.1.pro     | SGAPI | TVVI | NTLVNI | LYI  | FVAWEMLVGSKE  | KGQTWE   | SFKQNV | ELFCYGD  | DLI | MSVT | DKYK | DAFNA  |     | 2712 |
| AcSBV-VietNA-KX668140.1.pro    | SGAPI | TVVI | NTLVNI | LYI  | FVAWETLVGSR   | RERGQTWE | SFRQNV | ELFCYGD  | DLI | MSVT | DKYK | DTFNA  |     | 2712 |
| CSBV-FZ-KM495267.1.pro         | SGAPI | TVVI | NTLVNI | LYI  | FVAWETLVGSKER | GQTWE    | SFKQNV | ELFCYGD  | DLI | MSVT | DKYK | DTFNA  |     | 2717 |
| CSBV-LN2009-HM237361.1.pro     | SGAPI | TVVI | NTLVNI | LYI  | FVAWEMLVGSKE  | KGQTWE   | SFKQNV | ELFCYGD  | DLI | MSVT | DKYK | DAFNA  |     | 2717 |
| CSBV-GD-AF469603.1.pro         | SGAPI | TVVI | NTLVNI | LYI  | FVAWETLVGSKER | GQTWE    | SFKQNV | ELFCYGD  | DLI | MSVT | DKYK | DI     | FNA | 2730 |
| CSBV-BJ2012-KF960044.1.pro     | SGAPI | TVVI | NTLVNI | LYI  | FVAWETQVGSKE  | KGQTWE   | SFKQNI | ELFCYGD  | DLI | MSVT | DKYK | ETFNA  |     | 2730 |
| CSBV-SXnor1-KJ000692.1.pro     | SGAPI | TVVI | NTLVNI | LYI  | FVAWETLVGSKER | GQTWE    | SFKQNI | ELFCYGD  | DLI | MSVT | DKYK | ETFNA  |     | 2730 |
| CSBV-SXYL-KU574662.1.pro       | SGAPI | TVVI | NTLVNI | LYI  | FVAWETLVGSKER | GQTWE    | SFKQNI | ELFCYGD  | DLI | MSVT | DKYK | HTFNA  |     | 2729 |
| AmSBV-Viet6-KM884995.1.pro     | SGAPI | TVVI | NTLVNI | LYI  | FVAWETLVGSR   | RERGQTWE | SFKQNV | ELFCYGD  | DLI | MSVT | DKYK | DNFNA  |     | 2729 |
| AcSBV-Viet Nam-KJ959613.1.pro  | SGAPI | TVVI | NTLVNI | LYI  | FVAWETLVGSR   | RERGQTWE | SFKQNV | ELFCYGD  | DLI | MSVT | DKYK | DNFNA  |     | 2729 |
| AcSBV-VietBP-KX668139.1.pro    | SGAPI | TVVI | NTLVNI | LYI  | FVAWETLVGSR   | RERGQTWE | SFKQNV | ELFCYGD  | DLI | MSVT | DKYK | DNFNA  |     | 2729 |
| AmSBV-Kor2-KP296801.1.pro      | SGAPI | TVVI | NTLVNI | LYI  | FVAWETLVGSKER | GQTWE    | SFKLN  | VELFCYGD | DLI | MSVT | DKYK | DTFNA  |     | 2729 |
| AmSBV-UK-AF092924.1.pro        | SGAPI | TVVI | NTLVNI | LYI  | FVAWETLVGSKER | GQTWE    | SFKQNV | ELFCYGD  | DLI | MSVT | DKYK | DVFNA  |     | 2728 |

## VII

|                                | 2740         | 2750                                           | 2760 | 2770 | 2780 | 2790 |  |
|--------------------------------|--------------|------------------------------------------------|------|------|------|------|--|
| AmCSBV-SDLY.pro                | LTISQFLAQYGI | VATDANKGEKVEAYTTLLNSTFLKHGFRPHEVYPHCGQSALAWSSI | ND   | 2773 |      |      |  |
| AcSBV-Kor-HQ322114.1.pro       | LTISQFLAQYGI | VATDANKGEEVKAYTTLLNSTFLKHGFRPHEVYPHLWQSALAWSSI | ND   | 2773 |      |      |  |
| AcSBV-Kor4-KP296803.1.pro      | LTISQFLAHYGI | VATDANKGEKVEAYSTLVNSTFLKHGFRPHEVYPHLWQSALAWSSI | ND   | 2773 |      |      |  |
| AcSBV-Viet1-KM884990.1.pro     | LTISQFLAQYGI | VATDANKGEKVEAYATLVNSTFLKHGFRPHEVYPHLWQSALAWNSI | ND   | 2773 |      |      |  |
| AcSBV-Viet2-KM884991.1.pro     | LTISQFLAQYGI | VATDANKGEKVEAYATLVNSTFLKHGFRPHEVYPHLWQSALAWNSI | ND   | 2773 |      |      |  |
| AcSBV-Viet3-KM884992.1.pro     | LTISQFLAQYGI | VATDANKGEKVEAYATLVNSTFLKHGFRPHEVYPHLWQSALAWNSI | ND   | 2773 |      |      |  |
| AcSBV-Viet5-KM884994.1.pro     | LTISQFLAHYGI | VATDANKGEKVEAYSTLVNSTFLKHGFRPHEVYPHLWQSALAWGSI | ND   | 2773 |      |      |  |
| AcSBV-VietHYnor-KJ959614.1.pro | LTISQFLAHYGI | VATDANKGEKVEAYSTLVNSTFLKHGFRPHEVYPHLWQSALAWGSI | ND   | 2773 |      |      |  |
| AmSBV-Viet4-KM884993.1.pro     | LTISQFLAQYGI | VATDANKGEKVEAYATLVNSTFLKHGFRPHEVYPHLWQSALAWSSI | ND   | 2773 |      |      |  |
| AmSBV-Kor19-JQ390592.1.pro     | LTMSQFLAQYGI | VATDANKGEEVKAYTTLLNSTFLKHGFRPHEVYPHLWQSALAWSSI | ND   | 2773 |      |      |  |
| CSBV-JL2014-KU574661.1.pro     | LTISQFLAQYGI | VATDANKGEEVEAYTTLLNSTFLKHGFRPHEVYPHLWQSALAWNSI | ND   | 2773 |      |      |  |
| AcSBV-VietNA-KX668140.1.pro    | LTISQFLAQYGI | VATDANKGEEVEAYTTLLNSTFLKHGFRPHEVYPHLWQSALVWSSI | ND   | 2773 |      |      |  |
| CSBV-FZ-KM495267.1.pro         | LTISQFLAQYGI | VATDANKGEKVEAYTTLLNSTFLKHGFRPHEVYPHLWQSALAWSSI | ND   | 2778 |      |      |  |
| CSBV-LN2009-HM237361.1.pro     | LTISQFLAQYGI | VATDANKGEEVEAYTTLLNSTFLKHGFRPHEVYPHLWQSALAWNSI | ND   | 2778 |      |      |  |
| CSBV-GD-AF469603.1.pro         | LTISQFLAQYGI | VATDANKGEEVEAYTTLLNSTFLKHGFRPHEVYPHLWQSALAWSSI | ND   | 2791 |      |      |  |
| CSBV-BJ2012-KF960044.1.pro     | LTISQFLAQYGI | VATDANKGEEVEAYTTLLDSTFLKHGFRPHEVYPHLWQSALAWSSI | ND   | 2791 |      |      |  |
| CSBV-SXnor1-KJ000692.1.pro     | LTISQFLAQYGI | VATDANKGEEVEAYTTLLDSTFLKHGFRPHEVYPHLWQSALAWSSI | ND   | 2791 |      |      |  |
| CSBV-SXYL-KU574662.1.pro       | LTISQFLAQYGI | VATDANKGEEVEAYTTLLDSTFLKHGFRPHEVYPHLWQSALAWGSI | ND   | 2790 |      |      |  |
| AmSBV-Viet6-KM884995.1.pro     | LTISQFLAQYGI | VATDANKGEEVEAYTTLLNSTFLKHGFRPHEVYPHLWQSALAWSSI | ND   | 2790 |      |      |  |
| AcSBV-Viet Nam-KJ959613.1.pro  | LTISQFLAQYGI | VATDANKGEEVEAYTTLLNSTFLKHGFRPHEVYPHLWQSALAWSSI | ND   | 2790 |      |      |  |
| AcSBV-VietBP-KX668139.1.pro    | LTISQFLAQYGI | VATDANKGEEVEAYTTLLNSTFLKHGFRPHEVYPHLWQSALAWSSI | ND   | 2790 |      |      |  |
| AmSBV-Kor2-KP296801.1.pro      | LTISRFLAQYGI | VATDANKGEEVKAYTTLLNSTFLKHGFRPHEVYPHLWQSALAWSSI | ND   | 2790 |      |      |  |
| AmSBV-UK-AF092924.1.pro        | LTISQFLAQYGI | VATDANKGDEVEAYTTLLNSTFLKHGFHPHEVYPHLWQSALAWSSI | ND   | 2789 |      |      |  |

## VIII

|                                | 2800 | 2810   | 2820                | 2830             | 2840 |              |
|--------------------------------|------|--------|---------------------|------------------|------|--------------|
| AmCSBV-SDLY.pro                | TTQW | WECADL | KLATRENCRAALYQAHGHG | SVVYNRFKQQVNKALI | KRKI | QPIALSW 2829 |
| AcSBV-Kor-HQ322114.1.pro       | TTQW | WECADL | KLATRENCRAALYQAHGHG | SVVYNRFKQQVNKALV | KRKI | QPIALSW 2829 |
| AcSBV-Kor4-KP296803.1.pro      | TTQW | WECADL | KLATRENCRAALYQAHGHG | SVVYNRFKQQVNKALI | KRKI | QPIALSW 2829 |
| AcSBV-Viet1-KM884990.1.pro     | TTQW | WECADL | KLATRENCRAALYQAHGHG | SVVYNRFKQQVNKALI | KRKI | QPIALSW 2829 |
| AcSBV-Viet2- KM884991.1.pro    | TTQW | WECADL | KLATRENCRAALYQAHGHG | SVVYNRFKQQVNKALI | KRKI | QPIALSW 2829 |
| AcSBV-Viet3-KM884992.1.pro     | TTQW | WECADL | KLATRENCRAALYQAHGHG | SVVYNRFKQQVNKALI | KRKI | QPIALSW 2829 |
| AcSBV-Viet5-KM884994.1.pro     | TTQW | WECADL | KLATRENCRAAVYQAHGHG | SVVYNRFKQQVIKALI | KRKI | QPIALSW 2829 |
| AcSBV-VietHYnor-KJ959614.1.pro | TTQW | WECADL | KLATRENCRAALYQAHGHG | SVVYNRFKQQVNKALI | KRKI | QPIALSW 2829 |
| AmSBV-Viet4-KM884993.1.pro     | TTQW | WECADL | KLATRENCRAALYQAHGHG | SVVYNRFKQQVNKALI | KRKI | QPIALSW 2829 |
| AmSBV-Kor19-JQ390592.1.pro     | TTQW | WECADL | KLATRENCRAALYQAHGHG | SVVYNRFKQQVNKALI | KRKI | QPIALSW 2829 |
| CSBV-JL2014-KU574661.1.pro     | TTQW | WECADL | KLATRENCRAALYQAHGHG | SVVYNRFKQQVNKALV | KRKI | QPIALSW 2829 |
| AcSBV-VietNA-KX668140.1.pro    | TTQW | WECADL | KLATRENCRAALYQAHGHG | SVVYNRFKQQVNKALI | KRKI | QPIALSW 2829 |
| CSBV-FZ-KM495267.1.pro         | TTQW | WECADL | KLATRENCRAALYQAHGHG | SVVYNRFKQQVNKALI | KRKI | QPIALSW 2834 |
| CSBV-LN2009-HM237361.1.pro     | TTQW | WECADL | KLATRENCRAALYQAHGHG | SVVYNRFKQQVNKALI | KRKI | QPIALSW 2834 |
| CSBV-GD-AF469603.1.pro         | TTQW | WECADL | KLATRENCRAALYQAHGHG | SVVYNRFKQQVNKALI | KRKI | QPIALSW 2847 |
| CSBV-BJ2012-KF960044.1.pro     | TTQW | WECADL | RLATRENCRAALYQAHGHG | SVVYNRFKQQVNKALI | KRKI | QPIALSW 2847 |
| CSBV-SXnor1-KJ000692.1.pro     | TTQW | WECADL | KLATRENCRAALYQAHGHG | SVVYNRFKQQVNKALI | KRKI | QPIALSW 2847 |
| CSBV-SXYL-KU574662.1.pro       | TTQW | WECADL | KLATRENCRAALYQAHGHG | SVVYNRFKQQVNKALI | KRKI | QPIALSW 2846 |
| AmSBV-Viet6-KM884995.1.pro     | TTQW | WECADL | KLATRENCRAALYQAHGHG | SVVYNRFKQQVNKALI | KRKI | QPIALSW 2846 |
| AcSBV-Viet Nam-KJ959613.1.pro  | TTQW | WECADL | KLATRENCRAALYQAHGHG | SVVYNRFKQQVNKALI | KRKI | QPIALSW 2846 |
| AcSBV-VietBP-KX668139.1.pro    | TTQW | WECADL | KLATRENCRAALYQAHGHG | SVVYNRFMQQVNKALI | KRKI | QPIALSW 2846 |
| AmSBV-Kor2-KP296801.1.pro      | TTQW | WECADL | KLATRENCRAALYQAHGHG | SVVYNRFKQQVNKALV | KRKI | QPIALSW 2846 |
| AmSBV-UK-AF092924.1.pro        | TTQW | WECADL | KLATRENCRAALYQAHGHG | SVVYNKFKQQVNQALI | KRKI | QPIALSW 2845 |
